# Supplementary material for: Thermally activated delayed fluorescence processes for Cu(i) complexes in solid-state: a computational study using quantitative prediction
Source: Royal Society of Chemistry journal article supplement (doi:10.1039/c8ra04978e), 2018-01-01
Supplement: c8ra04978e1.pdf [file c8ra04978e1.pdf]

## Electronic Supplementary Information (ESI)

### Comprehension on Thermally Activated Delayed Fluorescence Processes for Cu(I) Complexes in Solid-State: A Computational Study Using Quantitative Prediction

Lingling Lv<sup>\*a</sup>, Kui Liu<sup>a</sup>, Kun Yuan<sup>a</sup>, Yuancheng Zhu<sup>a</sup>, Yongcheng Wang<sup>b</sup>

<sup>a</sup> College of Chemical Engineering and Technology, Tianshui Normal University, Tianshui, GanSu 741001, China. E-mail: [lvling100@163.com](mailto:lvling100@163.com)

<sup>b</sup> College of Chemistry and Chemical Engineering, Northwest Normal University, Lanzhou, GanSu 730070, China. E-mail: [ycwang02@163.com](mailto:ycwang02@163.com)

---

\* Corresponding author: E-mail: [lvling002@163.com](mailto:lvling002@163.com)

Table S1. Obtained vital structural parameters for Cu complexes using the different functional methods, and compared to the experimental values.

| Parameters       | Cu(pop)(pz <sub>2</sub> BH <sub>2</sub> ) |          |            | Cu(pop)(pz <sub>4</sub> B) |          |            | Cu(pop)(pz <sub>2</sub> Bph <sub>2</sub> ) |          |            | Cu(dppb)(pz <sub>2</sub> Bph <sub>2</sub> ) |          |            |
|------------------|-------------------------------------------|----------|------------|----------------------------|----------|------------|--------------------------------------------|----------|------------|---------------------------------------------|----------|------------|
|                  | B3LYP                                     | LC-BLYP* | Exp. value | B3LYP                      | LC-BLYP* | Exp. value | B3LYP                                      | LC-BLYP* | Exp. value | B3LYP                                       | LC-BLYP* | Exp. value |
| R(Cu1-P1)        | 2.3606                                    | 2.2919   | 2.2704     | 2.3957                     | 2.3127   | 2.2925     | 2.4196                                     | 2.3322   | 2.2957     | 2.3457                                      | 2.2858   | 2.2571     |
| R(Cu1-P2)        | 2.3508                                    | 2.2838   | 2.2348     | 2.3348                     | 2.2766   | 2.2319     | 2.3245                                     | 2.2702   | 2.2203     | 2.3148                                      | 2.2778   | 2.2562     |
| R(Cu1-N1)        | 2.1002                                    | 2.0512   | 2.0501     | 2.0867                     | 2.0455   | 2.0444     | 2.0812                                     | 2.0407   | 2.0290     | 2.0555                                      | 2.0196   | 2.0182     |
| R(Cu1-N3)        | 2.1096                                    | 2.0535   | 2.0355     | 2.0917                     | 2.0404   | 2.0251     | 2.0799                                     | 2.0362   | 2.0197     | 2.0519                                      | 2.0168   | 2.0112     |
| ∠P1Cu1P2         | 112.57                                    | 112.62   | 112.15     | 112.77                     | 112.97   | 110.26     | 111.71                                     | 112.52   | 109.20     | 88.85                                       | 90.26    |            |
| ∠N1Cu1N3         | 94.01                                     | 95.59    | 96.14      | 92.95                      | 95.19    | 95.51      | 93.92                                      | 96.26    | 96.45      | 94.15                                       | 95.66    |            |
| MAD <sup>a</sup> | 0.0831                                    | 0.0224   |            | 0.0787                     | 0.0203   |            | 0.0851                                     | 0.0286   |            | 0.0563                                      | 0.0143   |            |
| MAD <sup>b</sup> | 1.41                                      | 0.51     |            | 2.535                      | 1.195    |            | 2.52                                       | 1.780    |            |                                             |          |            |

MAD<sup>a</sup>: Mean absolute deviations of bond lengths; MAD<sup>b</sup>: Mean absolute deviations of bond angles. The MAD values are calculated with respect to the corresponding experimental values,

$$\text{MAD} = 1/n \sum_i^n |R_{\text{cal.}} - R_{\text{exp.}}|$$

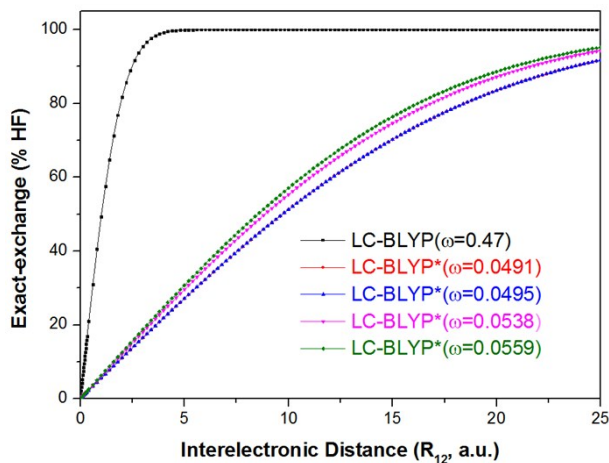

Figure S1. Percentage of exact-exchange (%HF) included as a function of the interelectronic distance ( $R_{12}$ ) for LC-BLYP functional in the solid state.

Table S2. The vital promote vibrational normal modes, and the corresponding Huang-Rhys factor ( $S_i$ ), reorganization energy ( $\lambda_i$ ) in the triplet state surfaces for the RISC processes.

| Cu(pop)(pz <sub>2</sub> BH <sub>2</sub> )                                                         | Cu(pop)(pz <sub>4</sub> B)                                                                     | Cu(pop)(pz <sub>2</sub> Bph <sub>2</sub> )                                                       | Cu(dppb)(pz <sub>2</sub> Bph <sub>2</sub> )                                           |
|---------------------------------------------------------------------------------------------------|------------------------------------------------------------------------------------------------|--------------------------------------------------------------------------------------------------|---------------------------------------------------------------------------------------|
| 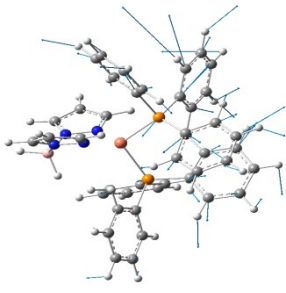               |             |              |  |
| $\nu_{78} = 699.6 \text{ cm}^{-1}$<br>$S_{78} = 2.07$<br>$\lambda_{78} = 1447.86 \text{ cm}^{-1}$ | $\nu_{16} = 63.7 \text{ cm}^{-1}$<br>$S_{16} = 1.07$<br>$\lambda_{16} = 68.63 \text{ cm}^{-1}$ | $\nu_{27} = 153.6 \text{ cm}^{-1}$<br>$S_{27} = 4.27$<br>$\lambda_{27} = 656.14 \text{ cm}^{-1}$ | $\nu_1 = 28.9 \text{ cm}^{-1}$<br>$S_1 = 2.42$<br>$\lambda_1 = 70.04 \text{ cm}^{-1}$ |

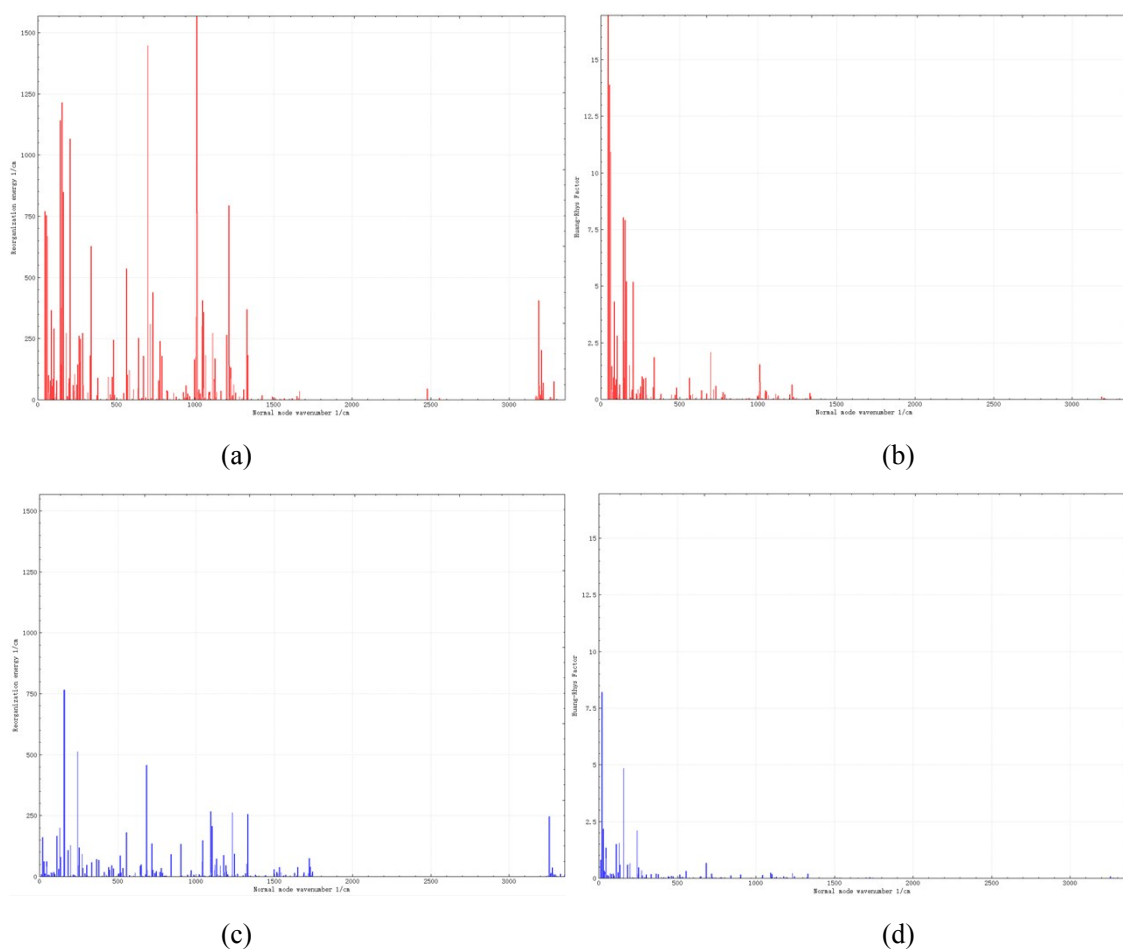

Figure S2. Calculated reorganization energies and Huang-Rhys factors versus the normal modes in term of the corresponding  $T_1$  (a, b, red) and  $S_1$  (c, d, blue) potential surfaces for  $\text{Cu}(\text{pop})(\text{pz}_2\text{BH}_2)$  at the PCM-tuned LC-BLYP\* level .

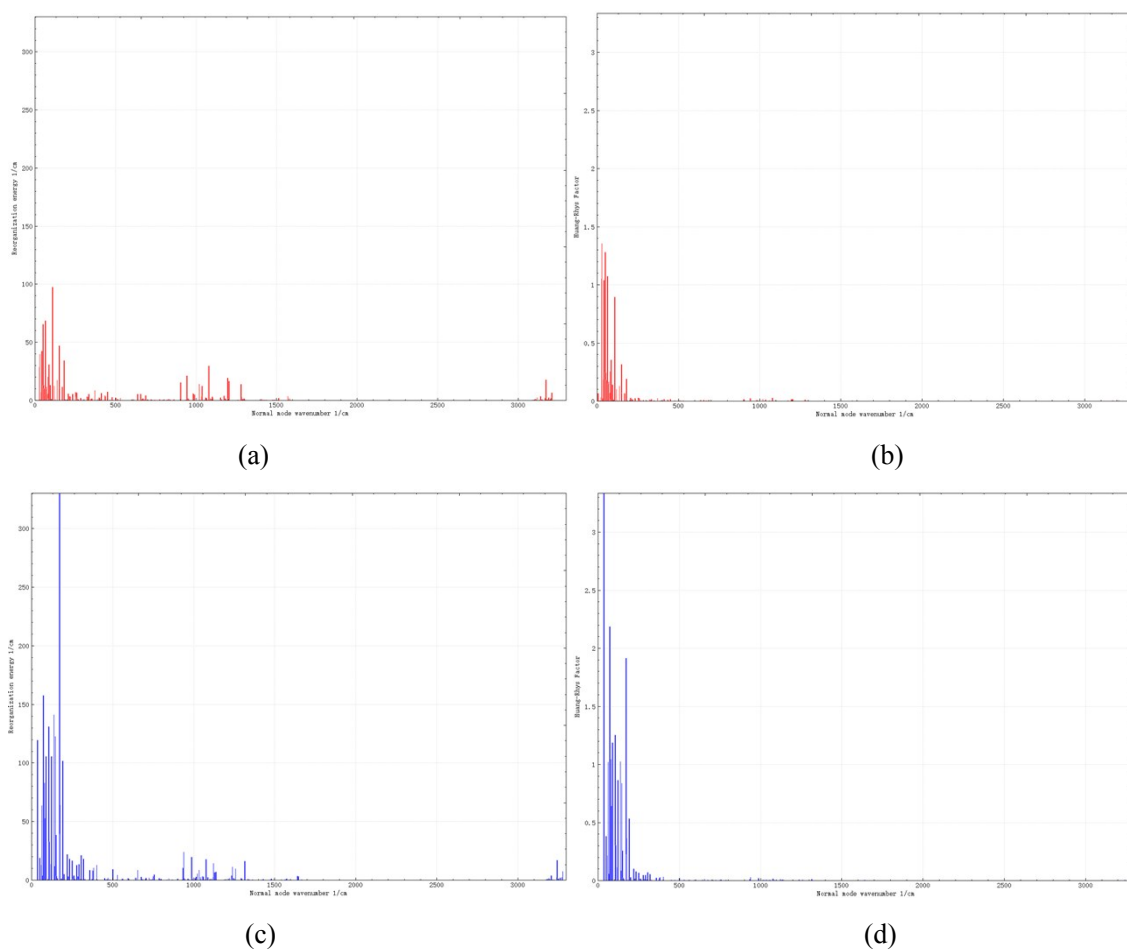

Figure S3. Calculated reorganization energies and Huang-Rhys factors versus the normal modes in term of the corresponding  $T_1$  (a, b, red) and  $S_1$  (c, d, blue) potential surfaces for Cu(pop)(pz<sub>4</sub>B) at the PCM-tuned LC-BLYP\* level .

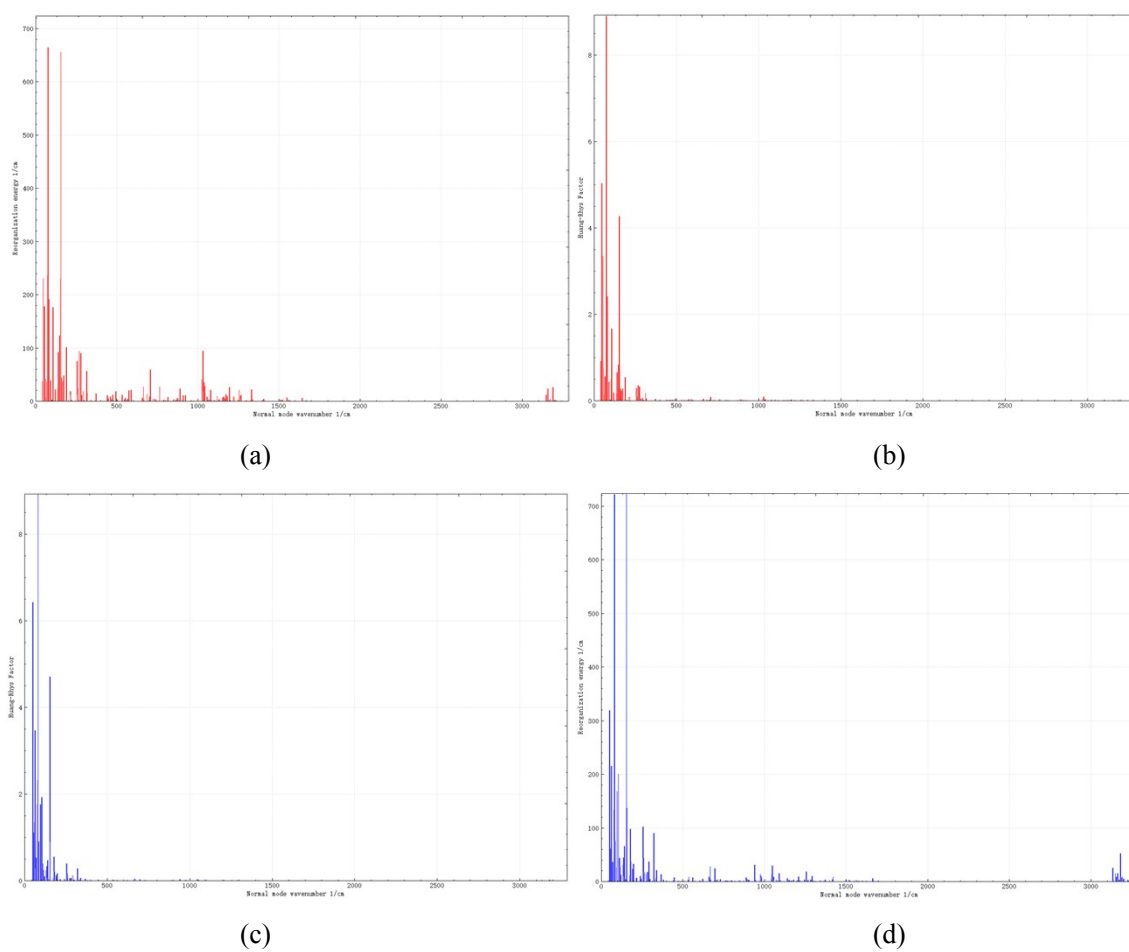

Figure S4. Calculated reorganization energies and Huang-Rhys factors versus the normal modes in term of the corresponding  $T_1$  (a, b, red) and  $S_1$  (c, d, blue) potential surfaces for  $\text{Cu}(\text{pop})(\text{pz}_2\text{Bph}_2)$  at the PCM-tuned LC-BLYP\* level .

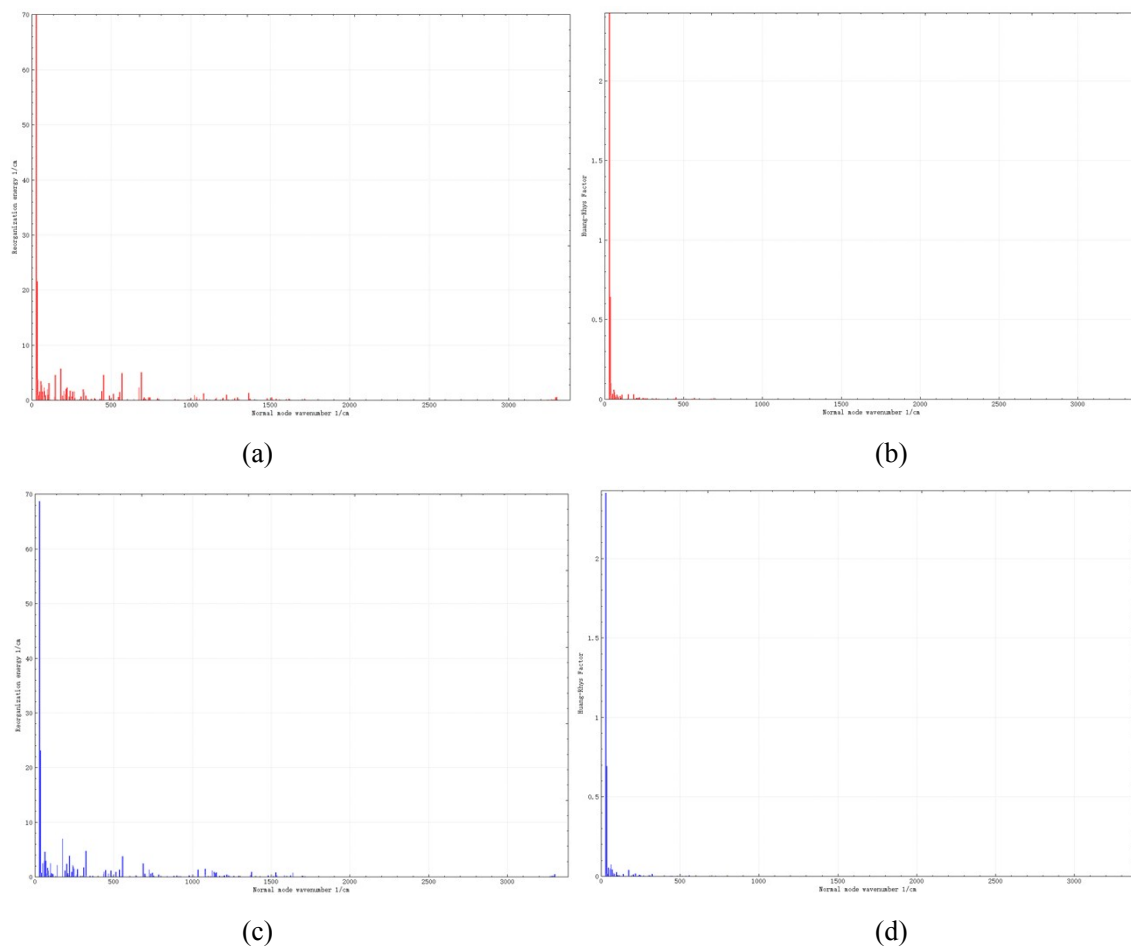

Figure S5. Calculated reorganization energies and Huang-Rhys factors versus the normal modes in term of the corresponding  $T_1$  (a, b, red) and  $S_1$  (c, d, blue) potential surfaces for  $\text{Cu}(\text{dppb})(\text{pz}_2\text{Bph}_2)$  at the PCM-tuned LC-BLYP\* level .
